# Integrating discovery-driven proteomics and selected reaction monitoring to develop a non-invasive assay for geoduck reproductive maturation

Emma B. Timmins-Schiffman<sup>1</sup>, Grace A. Crandall<sup>2</sup>, Brent Vadopalas<sup>2</sup>, Michael E. Riffle<sup>3</sup>, Brook L. Nunn<sup>1</sup>, Steven B. Roberts<sup>2,\*</sup>

<sup>1</sup>Department of Genome Sciences, University of Washington, Seattle, WA 98105

<sup>2</sup>School of Aquatic and Fishery Sciences, University of Washington, Seattle, WA 98105

<sup>3</sup>Department of Biochemistry, University of Washington, Seattle, WA 98105

\*Corresponding author:

Steven B. Roberts, School of Aquatic and Fishery Sciences, University of Washington, 1122 NE

Boat Street, Seattle WA 98105. email: [sr320@uw.edu](mailto:sr320@uw.edu)

## Abstract

Geoduck clams (*Panopea generosa*) are an increasingly important fishery and aquaculture product along the eastern Pacific coast from Baja California, Mexico to Alaska. These long-lived clams are highly fecund, though sustainable hatchery production of genetically diverse larvae is hindered by the lack of sexual dimorphism, resulting in asynchronous spawning of broodstock, unequal sex ratios, and low numbers of breeders. Development of assays of gonad physiology would indicate sex, maturation stage, as well as be used to assess status of natural populations. Proteomic profiles were determined for three reproductive maturation stages in both male and female clams using data dependent acquisition (DDA) of gonad proteins. Gonad

proteomes became increasingly divergent between males and females as maturation progressed. The DDA data was used to develop targets analyzed with selected reaction monitoring (SRM) in gonad tissue as well as hemolymph. The SRM assay yielded a suite of indicator peptides that can be used as an efficient assay to determine geoduck gonad maturation status. Application of SRM in hemolymph samples demonstrates this procedure could effectively be used to assess reproductive status in marine mollusks in a non-lethal manner.

**Key words: reproduction, gonad, geoduck, hemolymph, mollusk, proteomics, SRM, targeted proteomics**

## **Introduction**

Wild Pacific geoduck clams (*Panopea generosa*), like other suspension feeders, provide vital ecosystem services as both primary consumers of phytoplankton and biodepositors.<sup>1</sup> Additionally, commercial geoduck fisheries provide significant social benefits as the most economically important clam fishery in North America.<sup>2</sup> Commercial farming of geoduck now generates over 20 million dollars in annual sales and geoduck are among the most valuable farmed shellfish on a per acre basis.<sup>3</sup> The rapid development of geoduck aquaculture close to wild populations of conspecifics has raised concerns over farmed-wild interbreeding and the subsequent loss of genetic diversity. To address these concerns, geoduck hatcheries are currently encouraged to use large numbers of wild broodstock to maximize genetic diversity in farmed geoducks. An ongoing impediment to fulfilling this conservation goal is the absence of nonlethal identification methods for sex and maturation stage determination in broodstock. Geoducks are not sexually dimorphic, thus sex is not accurately determined until spawning, which can be

induced through increase in temperature and microalgae ration. Further, at a given event, only a few of the broodstock mature and spawn. Highly skewed sex ratios in some populations and the inability to determine when to induce spawning based on maturation state presents additional challenges.

To date, only a few studies have investigated molecular or biochemical analyses to identify sex or reproductive stages in marine invertebrates. For example, studies on vertebrate steroids explored these organic molecules as an analyte for tracking mollusk reproduction processes and stages.<sup>4</sup> There is suggestive evidence of steroidal metabolism and response in mollusks, but these pathways remain poorly understood in terms of biochemical mechanism and biological function.<sup>5</sup> Further research on gonad lipids<sup>6</sup>, specific gene transcripts<sup>7,8</sup>, and RNA/DNA ratios<sup>9</sup> have clarified some of the physiology underlying molluscan sexual maturation. A comprehensive study of the Pacific oyster gonadal gene expression across reproductive stages further explained the molecular mechanisms at play<sup>10</sup>; however, none of these studies translated physiological discovery into an applied assay.

Previous studies have demonstrated the promise of protein based assays for characterization of reproductive status in bivalves. Arcos et al.<sup>11</sup> explored the use of enzyme-linked immunoassay assays (ELISA) to quantify proteins associated with vitellogenesis to determine oyster oocyte maturation. Although the two proteins targeted by Arcos et al.<sup>11</sup> allowed distinction of males and females and differentiation of female reproductive stages, the assay relies on a single physiological measure and cannot be adapted to a non-lethal assay.<sup>4</sup> The complexity of molluscan reproductive maturation at the molecular level has been proven by global profiling studies<sup>10,12</sup> that reveal possibilities for an informative assay that leverages the involvement of diverse biochemical pathways.

Here, we apply mass spectrometry (MS)-based proteomics technology to provide a large-scale, unbiased approach for examining relative abundances of all proteins present in gonad tissue across several maturation stages of both female and male geoducks. Whole proteome characterization via data dependent acquisition (DDA) provided basic information on gametogenesis, gonad maturation, and informed peptide selection for the determination of sex and maturation stage in subsequent downstream MS analyses. Selected peptides underwent targeted proteomic analyses via selected reaction monitoring (SRM) to more accurately quantify protein abundance. Together, these data provide fundamental insight into marine mollusk reproductive biology and demonstrate effective non-invasive peptide quantification on circulating hemolymph.

## Methods

### *Tissue Sampling*

Geoduck clams were collected in November 2014 from Nisqually Reach, Washington (latitude:47 08.89, longitude:122 47.439 WGS84). Clams were collected at depths between 9 to 14 meters from a sandy substrate. Gonad tissue and hemolymph from geoduck clams at early-, mid-, and late-stage gonad maturation, from both males and females, were characterized histologically. Female reproductive maturation stages were categorized as follows: early-stage (no secondary oocytes, or oocytes that measure ~5-15 $\mu$ ), mid-stage (secondary oocytes ~50-70 $\mu$ ), and late-stage (secondary oocytes ~65-85 $\mu$ ). Male reproductive maturation stages were characterized as follows: early-stage (mostly somatic cells and ~5% spermatid composition per acinus), mid-stage (about equal parts somatic cells and reproductive tissue and ~50% spermatid composition per acinus), and late-stage (very little somatic cells and ~75-90% spermatid

composition per acinus). Details of gonadal maturation classification and histological details have been previously described.<sup>13</sup> Gonad tissue samples were taken from 3 early-stage females (fG03, fG04, fG08), 3 mid-stage females (fG34, fG35, fG38), 3 late-stage females (fG51, fG69, fG70), 3 early-stage males (mG02, mG07, mG09), 3 mid-stage males (mG41, mG42, mG46), and 3 late-stage males (mG65, mG67, mG68) with identification codes corresponding to those reported in Crandall et al.<sup>13</sup> Hemolymph tissue samples were taken from 3 early-stage females (fG18, fG29, fG30), 2 mid-stage females (fG25, fG35), 3 late-stage females (fG51, fG69, fG70), 3 early-stage males (mG17, mG20, mG028), 2 mid-stage males (mG42, mG46), and 3 late-stage males (mG65, mG67, mG68).

### *Protein Preparation*

Gonad tissue from the eighteen geoduck clams was sonicated in lysis buffer (50 mM  $\text{NH}_4\text{HCO}_3$ , 6 M urea). Gonad tissue protein homogenate content and hemolymph protein content were quantified using Pierce BCA Protein Assay Kit (Thermo Fisher Scientific, Waltham, MA; catalog #23225). Protein (100  $\mu\text{g}$  - gonad samples, 50  $\mu\text{g}$  - hemolymph) was evaporated to ~20  $\mu\text{l}$  and resuspended in 100  $\mu\text{l}$  of lysis buffer followed by sonication. Protein digestion for gonad tissue samples and hemolymph followed the protocol outlined in Timmins-Schiffman et al.<sup>14</sup> Briefly, each sample was incubated with tris(2-carboxyethyl)phosphine buffered at pH 8.8 (1 hr, 37°C). Samples were alkylated with iodoacetamide (IAM; 1hr, 20°C) followed by an incubation (1 hr) with dithiothreitol to absorb any remaining IAM. To each sample,  $\text{NH}_4\text{HCO}_3$  and HPLC grade methanol were added to dilute urea and to increase solubilization of membrane proteins. Samples were digested overnight with trypsin at 37°C. Digested samples were evaporated and reconstituted in 5% acetonitrile (ACN) + 0.1% trifluoroacetic acid (TFA) (100  $\mu\text{l}$ ) and pH was

decreased to < 2. Desalting of the samples was done using Macrospin columns (sample capacity 0.03-300 µg; The Nest Group, Southborough, MA, USA) following the manufacturer's specifications. Dried peptides were reconstituted in 100 µl of 5% ACN + 0.1% formic acid.

# *Global Proteome Analysis: Data-Dependent Acquisition (DDA) LC-MS/MS*

Data-dependent acquisition (DDA) was performed to examine gonad proteomic profiles across samples (Figure 1). Liquid chromatography coupled with tandem mass spectrometry (LC-MS/MS) was accomplished on a Q-Exactive-HF (Thermo) on technical triplicates for each sample. The analytical column (20 cm long) was packed in-house with C18 beads (Dr. Maisch GmbH HPLC, Germany, 0.3 µm) with a flow rate of 0.3 µl/min. Chromatography was accomplished with an increasing ratio of solvent A (ACN + 0.1% formic acid): solvent B (water + 0.1% formic acid). The solvent gradient consisted of: 0-1 minutes of 2-5% solvent A; 1-60 minutes 5-35% solvent A; 60-61 minutes 35-80% solvent A; 61-70 minutes 80% solvent A; 71-90 minutes 80-2% solvent A. Quality control standards (Pierce Peptide Retention Time Calibration mixture (PRTC) + bovine serum albumin peptides (BSA)) were analyzed throughout the experiment to ensure consistency of peptide detection and elution times.

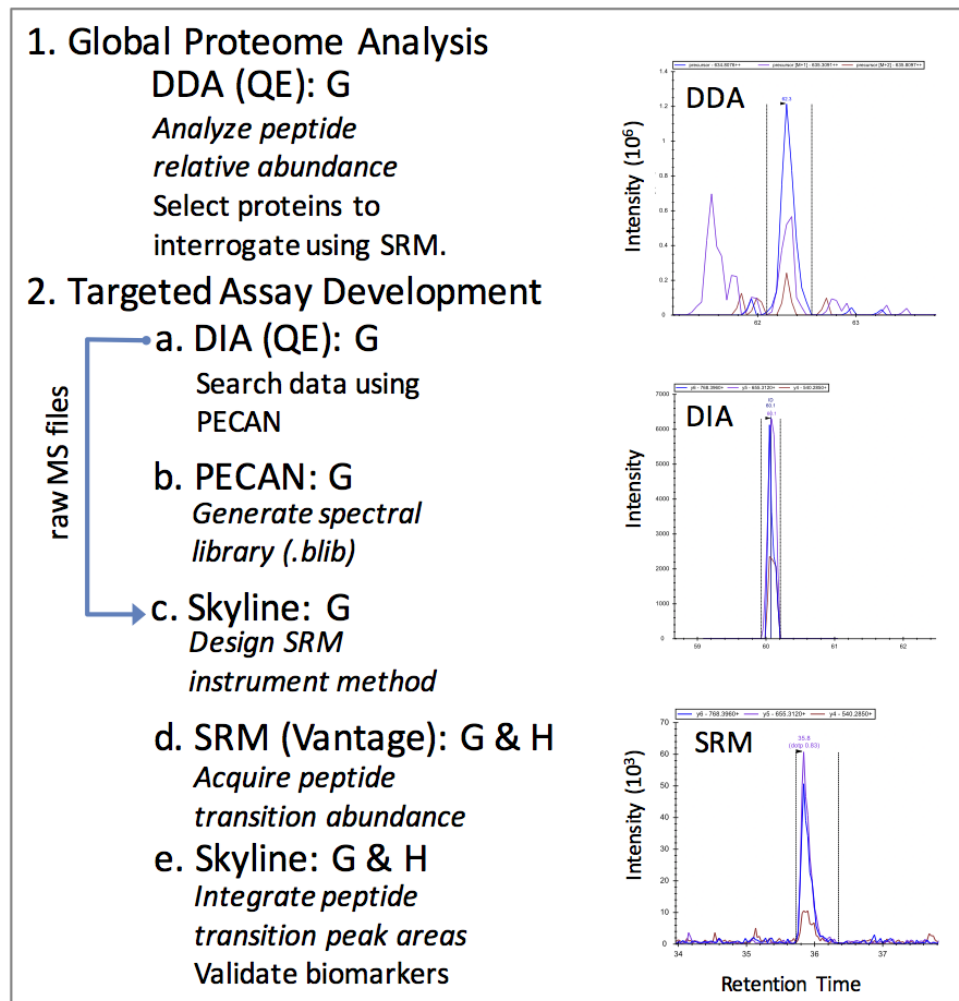

Figure 1. Illustration of experimental setup and workflow for mass spectrometry data acquisition and analysis. MS experimental workflow: 1. Data dependent acquisition (DDA) was performed on the Q-Exactive-HF (QE) to assess the global proteomic differences in gonad (G) tissue between sexes and maturation stages. 2. Targeted assay development followed the steps of (a) data independent acquisition (DIA) on gonad tissue was also completed on the QE to create spectral libraries for selected reaction monitoring (SRM) method development; (b & c) spectral libraries were analyzed in PECAN using Skyline to select optimal transitions and design an instrument method for SRM analyses; (d) SRM was completed on the TSQ Vantage for geoduck peptide transitions in gonad and hemolymph (G & H); (e) Peptide transition detection and

*quantification was performed in Skyline. The chromatograms of peptide KEEELIDYMKQ (from protein I30261\_c0\_seq1/m.17926) were collected using the 3 different MS approaches (DDA, DIA, and SRM) from the same late-stage female. Black vertical lines indicate peak integration boundaries, and colored peaks represent the different transitions (i.e. peptide fragments) collected.*

#### *DDA protein identification and quantification*

Gonad peptides were identified and proteins inferred using a proteome derived from a *de novo* assembled transcriptome of a male and female geoduck clam gonad tissue libraries (NCBI Bioproject Accession #PRJNA316216) (Del Rio-Portilla et al., unpublished). Briefly, reads were assembled using Trinity<sup>15</sup> and deduced protein sequences determined using the Transdecoder algorithm within Trinity. Raw mass spectrometry data (PRIDE Accession #PXD003127) was searched against the protein sequences (Supporting Information 1) using Comet v 2015.01 rev.2.<sup>15,16</sup> Parameters used with Comet included specifying trypsin as the cleaving enzyme, two missed cleavages allowed, peptide mass tolerance of 20 ppm, cysteine modification of 57 Da (from the IAM) and methionine modification of 15.999 Da (from oxidation) to find peptide spectral matches (Supporting information 2). Protein inference and match probability were found using the Trans-Proteomic Pipeline with a probability cut-off of 0.9.<sup>16,17</sup> Protein identifications were considered true matches when the probability of the match was at least 0.9 and at least 2 independent spectra were associated with the protein across all samples.

Non-metric multidimensional scaling analysis (NMDS) was used to determine the similarity of technical replicates (Supporting Information 3) using the vegan package<sup>18</sup> in R v. 3.2.3<sup>19</sup>. NMDS was performed on log-transformed data using a Bray-Curtis dissimilarity matrix.



As technical replicates clustered closely together and showed less variability than biological replicates (Supporting Information 4), spectral counts were averaged across each sample (n=18). Normalized spectral abundance factors (NSAF) were calculated on the averaged spectral counts for all high confidence, detected proteins as a proxy for protein expression.<sup>20</sup> Proteomic differences between sexes and maturation stages were explored with two methods: 1) NMDS and analysis of similarity (ANOSIM) were used to compare the entire proteomic profiles in multivariate space and 2) QSpec<sup>21</sup> was used to determine significant differences at the individual protein level. NMDS was performed on NSAF data followed by ANOSIM in the vegan package in R to determine the differences between sexes and maturation stages. Differentially abundant proteins among the six conditions were identified using QSpec (<http://www.nesvilab.org/qspect.php/>).<sup>21</sup> Spectral counts were summed across technical replicates to create input files for QSpec with data normalized by abundance. Nine comparisons were analyzed for differentially abundant proteins: Early-stage male (EM) vs. early-stage female (EF); mid-stage male (MM) vs. mid-stage female (MF); late-stage male (LM) vs. late-stage female (LF); EM vs. MM; EM vs. LM; MM vs. LM; EF vs. MF; EF vs. LF; MF vs. LF. Proteins were considered significantly different when the absolute value of the log fold change was  $\geq 0.5$  and the absolute value of the z-statistic was  $\geq 2$ .

### *Enrichment Analysis*

We used enrichment analysis to determine biological processes (represented by detected proteins) predominant in each gonad sample. GO enrichment analysis was performed for each maturation stage (for each sex) on 1) unique proteins and 2) all detected proteins. In both cases, the entire detected proteome was used as the background. The uniquely detected proteins were

the basis for targeted proteomics assay development (see below). Enrichment analysis was also performed on sets of differentially abundant proteins from QSpec analyses. Code used to perform enrichment analysis is available in a corresponding GitHub repository (<https://github.com/yeastrc/compgo-geoduck-public>) as is the underlying code for the end user web-interface ([http://yeastrc.org/compgo\\_geoduck/pages/goAnalysisForm.jsp](http://yeastrc.org/compgo_geoduck/pages/goAnalysisForm.jsp)). Briefly, a p-value was calculated describing the enrichment of a GO term in a set of tested proteins above what would be expected by chance, given the annotation of the geoduck gonad proteome (3,627 proteins). A p-value cutoff of 0.01 was used to ascribe statistical significance to GO terms representing biological process.

GO terms were first assigned directly to the geoduck gonad protein names resulting from the *de novo*-assembled transcriptome. This was done by assigning GO terms associated with Uniprot-KB Swiss-Prot BLASTp hits. A p-value representing the statistical significance of the representation of a GO term in a set of proteins was calculated using the hypergeometric distribution using the following formula:

$$P(I) = \frac{\binom{A}{I} * \binom{T-A}{B-I}}{\binom{T}{B}}$$

Where A = total number of proteins submitted that have a GO annotation, B = the total number of proteins in the background proteome annotated with the given GO term (or any of its descendants), I (intersection of A and B) = the total number of submitted proteins annotated with the given GO term (or any of its descendants), and T = the total number of annotated proteins in the proteome background.

Then, the p-value describing the chance of having an intersection of size I or larger by chance may be computed as:

$$P\text{-value} = \sum_{i=I}^{\min(A,B)} P(i), \text{ where } \min(A,B) \text{ is the minimum of values A and B.}$$

The p-value is then corrected for multiple hypothesis testing using the Bonferroni method by multiplying the p-value by the number of GO terms tested (setting resulting values over 1 to 1). The number of GO terms tested equals the number of GO terms found (and all ancestors) for the submitted set of proteins.

Complete directed acyclic graphs (DAG) that represent a subset of the whole GO DAG were generated to visualize enriched biological processes. These DAGs were then filtered by removing all childless terms that had an associated p-value  $\geq 0.01$ . The resulting DAGs were then filtered using the same method, and this process repeated until no childless terms remained with a p-value above the cutoff. The final result is a filtered subset of the GO DAG that contains no leaf nodes with a p-value greater than the cutoff, but where a given term is guaranteed to have all of its ancestor terms, even if those terms have a p-value greater than the cutoff. Having the ancestor terms present is critical to visualization as they provide context for interpreting the results. Proteins that contribute to specific enriched processes for all enrichment analyses are included in Supporting Information 5 and visualizations of enrichments for full and unique proteomes for each sex and stage are visualized in a single DAG for each sex and stage (Supporting Information 6). Venn diagrams of enriched processes were produced in Venny<sup>22</sup>.

*Targeted Assay Development: Selected Reaction Monitoring (SRM)*

A subset of proteins was chosen for development of a suite of targeted assays using selected reaction monitoring (SRM) on the mass spectrometer. Based on the data dependent acquisition, proteins that were detected in only one of these gonadal stages; early-stage males (EM), early-stage females (EF), late-stage males (LM), or late-stage females (LF) were screened for usable peptide transitions in SRM in Skyline daily v. 3.5.1.9706<sup>23</sup>.

Data independent acquisition (DIA) was used to generate spectral libraries for biomarker development in the gonad tissue (Figure 1). Equal amounts of isolated peptides from the three biological replicates for EM, EF, LM, and LF used in the DDA experiment (described above) were pooled in equal quantities for DIA on the Q-Exactive HF (Thermo). Each sample included a spiked-in internal quality control peptide standard (375 fmol PRTC + BSA; Pierce, hereafter referred to as “QC”). Sample injections for all DIA experiments included protein (1 µg) plus the QC (50 fmol) in a 2 µl injection. An analytical column (27cm) packed with C18 beads (3 µm; Dr. Maisch) and a trap (3 cm) with C12 beads (3 µm; Dr. Maisch) were used for chromatography. Technical replicate DIA spectra were collected in 4 m/z isolation width windows spanning 125 m/z ranges each<sup>24</sup> (400-525, 525-650, 650-775, 775-900). For each method, a gradient of 5-80% ACN over 90 minutes was applied for peptide spectra acquisition. Raw data can be accessed via ProteomeXchange under identifier PXD004921. MSConvert<sup>25</sup> was used to generate mzML files from the raw DIA files.

Peptide Centric Analysis was completed with the software program PECAN to generate spectral libraries for targeted method development<sup>26</sup>. Input files included the list of peptides generated for SRM (n=212), as described above, and the mzML files generated from the raw DIA files. PECAN correlates a list of peptide sequences with the acquired DIA spectra to locate

the peptide-specific spectra within the acquired DIA dataset. A background proteome of the *in silico* digested geoduck gonad proteome was used.

The PECAN output file (.blib) was imported into Skyline to select peptide transitions and create MS methods that would target specific peptides and transitions. Peptide transitions are the reproducible fragments of peptides that are generated during the MS2 scan. Peptides reliably fragment in the same way in the mass spectrometer, therefore transitions are a robust and consistent signal of a peptide's presence.<sup>27</sup> Peptide transitions were selected if peak morphology was uniform and consistent across the MS2 scans for technical replicates. Peptides were selected for targeted analysis if they had  $\geq 3$  good quality transitions and there were  $\geq 2$  peptides per protein. A maximum of 4 transitions per peptide were selected for targeted analysis and no more than 3 peptides per protein were selected. The final list included 25 transitions for EM biomarkers, 22 for EF, 133 for LM, and 52 for LF. This transition list was divided between two method files for the final SRM analyses to provide adequate dwell time on individual transitions to accurately detect and measure all peptides desired.<sup>28</sup>

Selected reaction monitoring (SRM) was carried out on a Thermo Vantage for all eighteen geoduck gonad samples used in the original DDA analysis. Samples were prepared as described above for DIA (1  $\mu$ g of protein per 3  $\mu$ l injection). A new C18 trap (2 cm) and C18 analytical column (27.5 cm) were used and each sample was analyzed in triplicate across two MS experiments to cover the entire peptide transition list (n=212). Raw data can be accessed in the PeptideAtlas under accession PASS00943.

Hemolymph from early-, mid-, and late-stage males and females was also assayed for sex- and stage-specific biomarkers. An augmented SRM assay was used on the hemolymph that included all the peptide transitions analyzed in the gonad with an additional 40 transitions from

five new proteins. These proteins were selected based on gonad proteome annotation to include 1) proteins that would likely be circulating in the hemolymph and 2) gonad proteins that had homology with the mussel hemolymph proteome<sup>29</sup>. The additional peptides for SRM analysis of hemolymph were from vitellogenin (2 proteins: cds.comp100108\_c2\_seq1|m.5995, cds.comp144315\_c0\_seq1|m.50928), glycogen synthase (2 proteins: cds.comp140343\_c0\_seq2|m.34696, cds.comp141785\_c0\_seq1|39776), and glycogenin-1 (cds.comp140645\_c0\_seq3|m.35608). PECAN generated spectral libraries, as described above, and Skyline software selected hemolymph protein transitions to target during SRM analyses. For the new hemolymph proteins, the minimum targets for peptides ( $\geq 3$ ) and transitions ( $\geq 2$ ) as described for gonad SRM could not be met for every protein, but were still included in the analysis. These transitions, and the previous gonad transitions (total of  $n = 254$ ), were analyzed across sixteen geoduck hemolymph samples in two technical replicates, as described above for the gonad. Some of these peptides yielded no data in the hemolymph, resulting in a dataset of 171 peptide transitions that were reliably detected. Raw data can be accessed in PeptideAtlas under accession PASS00942.

Acquired SRM data in gonad and hemolymph were analyzed in Skyline for peptide transition quantification. Skyline documents that were used to analyze the monitored peptide transitions can be found on Panorama for the gonad dataset and the hemolymph datasets ([panoramaweb.org/labkey/geoduckrepro.url](http://panoramaweb.org/labkey/geoduckrepro.url)). Peak presence was determined based on consistency of retention time (verified by spiked in QC peptides) and peak morphology.

All peptide transition peak intensities were exported from Skyline for automated peak selection and peak integration analysis. QC internal standard transitions were monitored for consistency across runs by calculating the coefficient of variation (CV) of transition peak area

across injections. Peak intensities for the geoduck peptide transitions were normalized by dividing by the averaged intensities for the QC peptide transitions (6) that had the lowest CV in the gonad data (CV < 13) and the 6 with the lowest CV in the hemolymph data (CV < 10).

NMDS and ANOSIM were performed on the QC-normalized SRM dataset as described above for the DDA dataset. An initial NMDS showed that technical replicates clustered together well and that variation was lower within biological replicates compared to between replicates, therefore technical replicate peak intensities were averaged for the rest of the analysis (Supporting Information 7). ANOSIM was performed using grouping by sex and reproductive stage alone, as well as by a combined sex-stage factor. Coefficients of variation were calculated for combined technical replicates using the raster<sup>30</sup> package in R.

Eigenvector loadings were calculated for the gonad and hemolymph data using the vegan package in R. For each dataset, the top 20 transitions with the combination of lowest p-value and highest loading value were selected as biomarkers. Heatmaps of the log-normalized transition intensities for these biomarkers were made using pheatmap<sup>31</sup> in R, clustering rows (peptide transitions) and columns (samples) using euclidean distance and the average clustering method.

## Results

### *DDA Proteomics*

The mass spectrometry data (PRIDE Accession #PXD003127) interpreted with a species- and tissue-specific transcriptome yielded 3,627 proteins inferred with high confidence across all gonad tissue samples (total spectral count across all replicates > 1) (Supporting Information 5). Female and male gonad proteomic profiles were more similar in early-stage maturation, with proteomes diverging as reproductive maturity advanced (Figure 2). Proteomic profiles were

significantly different between sexes ( $R = 0.4122$ ,  $p = 0.002$ ) and maturation stages ( $R = 0.3025$ ,  $p = 0.004$ ).

Unique proteomic profiles include the set of proteins that were detected in a specified sex or specific stage within sex in the DDA analysis. The female proteomic profile across all stages contained 305 unique proteins whereas 522 proteins were unique to males. The number of proteins unique to a specific maturation stage increased with maturity from 24 and 20 in early-stage females and males, respectively, to 161 and 145 in late-stage females and males (Figure 3). These unique proteomes were used to develop the downstream SRM assays. Enriched GO biological processes for the unique proteins and all detected proteins for each sex and stage are summarized in Table 1. Only the most specific GO terms (i.e., farthest down on the DAG) are listed; parent terms were frequently enriched as well and can be seen in the DAGs (Supporting Information 6).

*Table 1. Enriched biological process GO terms for the unique proteins and all detected proteins in the gonad for each sex and stage. If no GO terms are listed, no enriched processes were identified*



| Gonad Stage        | Detected Proteome GO terms                                                                                                                                 | Unique Proteome GO terms                                                                                          |
|--------------------|------------------------------------------------------------------------------------------------------------------------------------------------------------|-------------------------------------------------------------------------------------------------------------------|
| Early-stage Female | Actin filament organization; Translation                                                                                                                   | Protein phosphorylation                                                                                           |
| Mid-stage Female   | Hexose metabolic process; Translation; Translational initiation                                                                                            | Regulation of hydrolase activity                                                                                  |
| Late-stage Female  | DNA replication; Translation; Translational initiation                                                                                                     | Protein glycosylation; Signal peptide processing; Homophilic cell adhesion via plasma membrane adhesion molecules |
| Early-stage Male   | Translation; Oxidation-reduction process; Small molecule metabolic process                                                                                 |                                                                                                                   |
| Mid-stage Male     | Translation; ATP metabolic process; Pyruvate metabolic process; Oxidation-reduction process; Nucleotide phosphorylation; Single organism catabolic process |                                                                                                                   |
| Late-stage Male    | Translation; Cellular macromolecular complex assembly; Nucleotide metabolic process                                                                        | Microtubule-based movement                                                                                        |

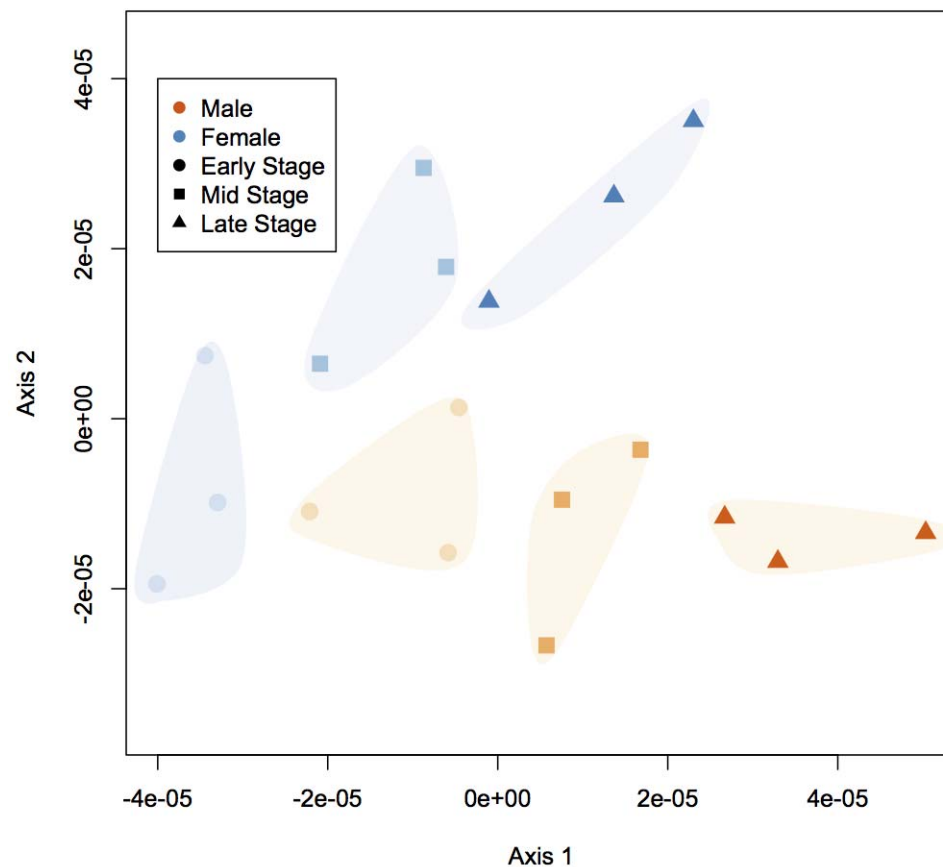

Figure 2. Non-metric multidimensional scaling plot (NMDS) of geoduck gonad whole proteomic profiles generated by data dependent acquisition. Gonad proteomes differ among clams by both sex (male = orange, female = blue) and stage (early-stage = circles, mid-stage = squares, late-stage = triangles;  $p < 0.05$ ).

Numerous proteins were differentially abundant in comparisons between reproductive stage and sex based on analysis with QSpec. The number of differentially abundant proteins within a stage and between sexes increased from 387 between early-stage males and females to 1035 between late-stage males and females (Figure 4, Supporting Information 5). Enrichment

analysis revealed which processes were over-represented in the sets of differentially abundant proteins, when compared to the entire proteome (Figure 4 and Supporting Information 8).

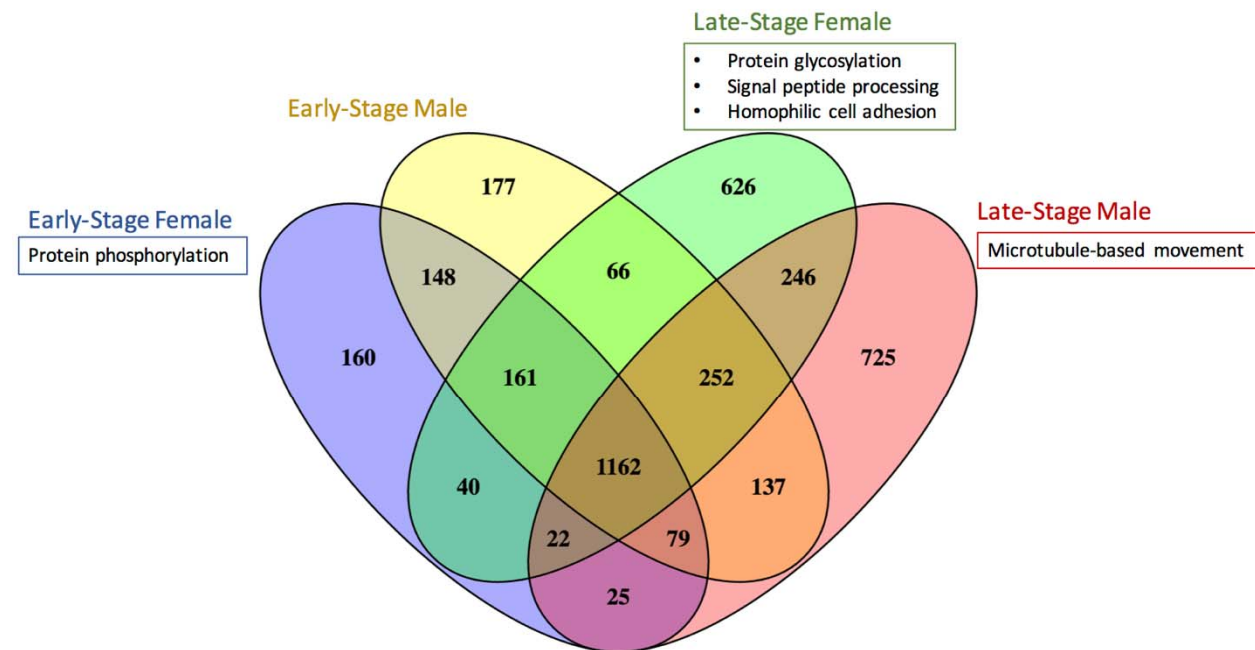

Figure 3. Number of proteins detected in sex and stage specific proteomes for early-stage female (blue), early-stage male (yellow), late-stage female (green), and late-stage male (red). Biological processes enriched in the sex- and stage-specific proteomes compared to all proteins detected across sexes and stages are listed for each proteome.

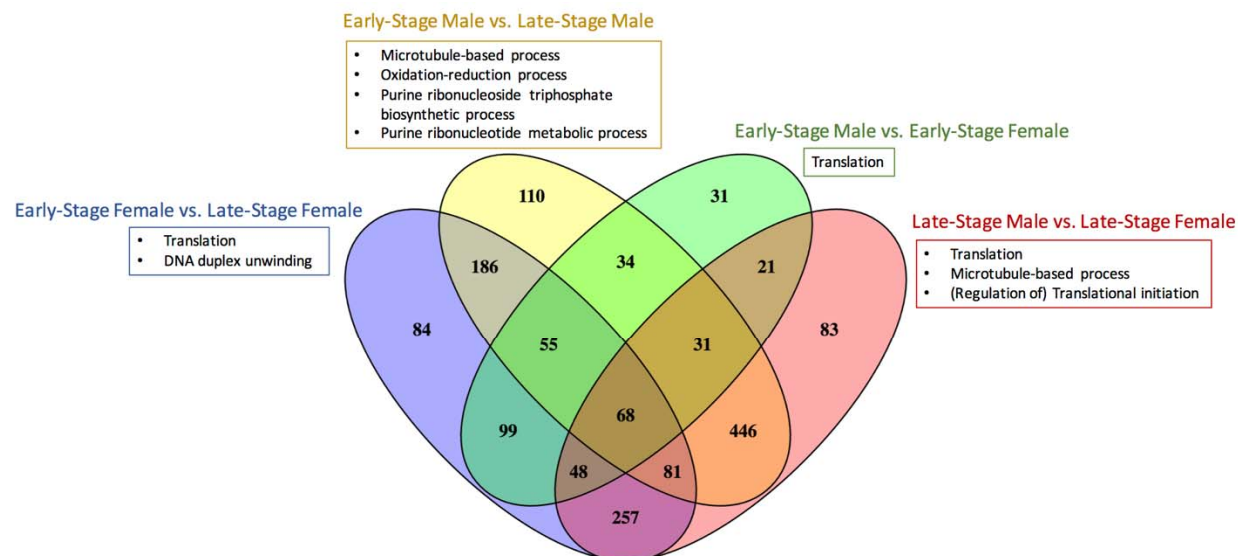

Figure 4. Number of differentially abundant proteins between geoduck sexes and stages based on QSpec analysis comparisons between early-stage males (EM) and mid-stage males (MM); EM and late-stage males (LM); early-stage females (EF) and mid-stage females (MF); EF and late-stage females (LF). Biological processes enriched in the sets of differentially abundant proteins, compared to all proteins detected across sexes and stages, are listed for each proteome.

# Targeted Assay Development: Selected Reaction Monitoring (SRM)

SRM was applied to create peptide assays that could resolve geoduck sex and maturation stages. Peptide transitions in the gonad (n=212) and hemolymph (n=171) derived from proteins detected in a single sex-maturation stage from one of the following: early-stage male (EM), early-stage female (EF), late-stage male (LM), and late-stage female (LF) proteomes were measured across 18 geoduck gonad samples and 16 hemolymph samples (Supporting Information 9). Many transitions had stable coefficients of variation across all biological

replicates, although more than 6% of the peptide transitions had CVs > 100, indicating a need for assay optimization (Supporting Information 10).

In an ordination plot, the gonad SRM data resolved males and females better in late-stage samples than the early- or mid-stage (Supporting Information 7). There was significant separation based on gonad SRM data for sex ( $R = 0.2373$ ,  $p=0.003$ ), stage ( $R=0.2189$ ,  $p=0.007$ ), and a combined sex-stage factor ( $R=0.4132$ ,  $p=0.001$ ). The hemolymph SRM data only resolved the late-stage female group from the rest of the geoduck (Supporting Information 7). There was significant separation of the hemolymph proteomic profiles based on sex ( $R=0.1384$ ,  $p=0.043$ ) and sex-stage ( $R=0.4892$ ,  $p=0.001$ ), but not by stage alone ( $R=0.1435$ ,  $p=0.065$ ).

Peptide transitions that directed the observed spread of the geoduck sex-stage data along Axis 1 and Axis 2 in the NMDS plots (determined by eigenvector analysis) were considered key analytes for differentiating groups. These peptide transitions represent a starting point for biomarker assay optimization. Peptides that drove the separation of the male maturation stages along Axis 1 in the gonad NMDS plot (Supporting Information 7) are from a set of 9 proteins: flap endonuclease (cds.comp130260\_c0\_seq1|m.17926), IQ domain-containing protein K (cds.comp133232\_c0\_seq1|m.21239), WD repeat-containing protein on Y chromosome (cds.comp131715\_c0\_seq1|m.19472), tetratricopeptide repeat protein 18 (cds.comp139151\_c0\_seq5|m.31757), spectrin alpha chain (cds.comp141647\_c0\_seq1|m.39026), and four uncharacterized proteins (cds.comp135264\_c2\_seq1|m.24100, cds.comp144596\_c0\_seq1|m.53297, cds.comp140866\_c0\_seq1|m.36276, cds.comp139654\_c0\_seq1|m.32810) (Figure 5). Proteins that played a significant role in the separation of the female stages along Axis 2 for the gonad data included WD repeat-containing protein on Y chromosome (cds.comp131715\_c0\_seq1|m.19472), tetratricopeptide repeat

protein 18 (cds.comp139151\_c0\_seq5|m.31757), spectrin alpha chain  
(cds.comp141647\_c0\_seq1|m.39026), centrosomal protein of 70 kDa  
(cds.comp133063\_c0\_seq1|m.21029), and four uncharacterized proteins  
(cds.comp135264\_c2\_seq1|m.24100, cds.comp131654\_c1\_seq1|m.19394,  
cds.comp140866\_c0\_seq1|m.36276, cds.comp139654\_c0\_seq1|m.32810). Analysis of the  
hemolymph SRM NMDS (Supporting Information 7) reveals that the main peptide drivers along  
Axis 1 (separating late-stage females from all other geoduck) were from three proteins: flap  
endonuclease (cds.comp130260\_c0\_seq1|m.17926), vitellogenin  
(cds.comp144315\_c0\_seq1|m.50928), and one uncharacterized protein  
(cds.comp138018\_c0\_seq1|m.29238) (Figure 6). A cluster analysis of the 20 transitions that  
were primary drivers of sex differentiation exposed a significant separation of males and females  
in the hemolymph data, but little resolution of different maturation stages (Figure 6).

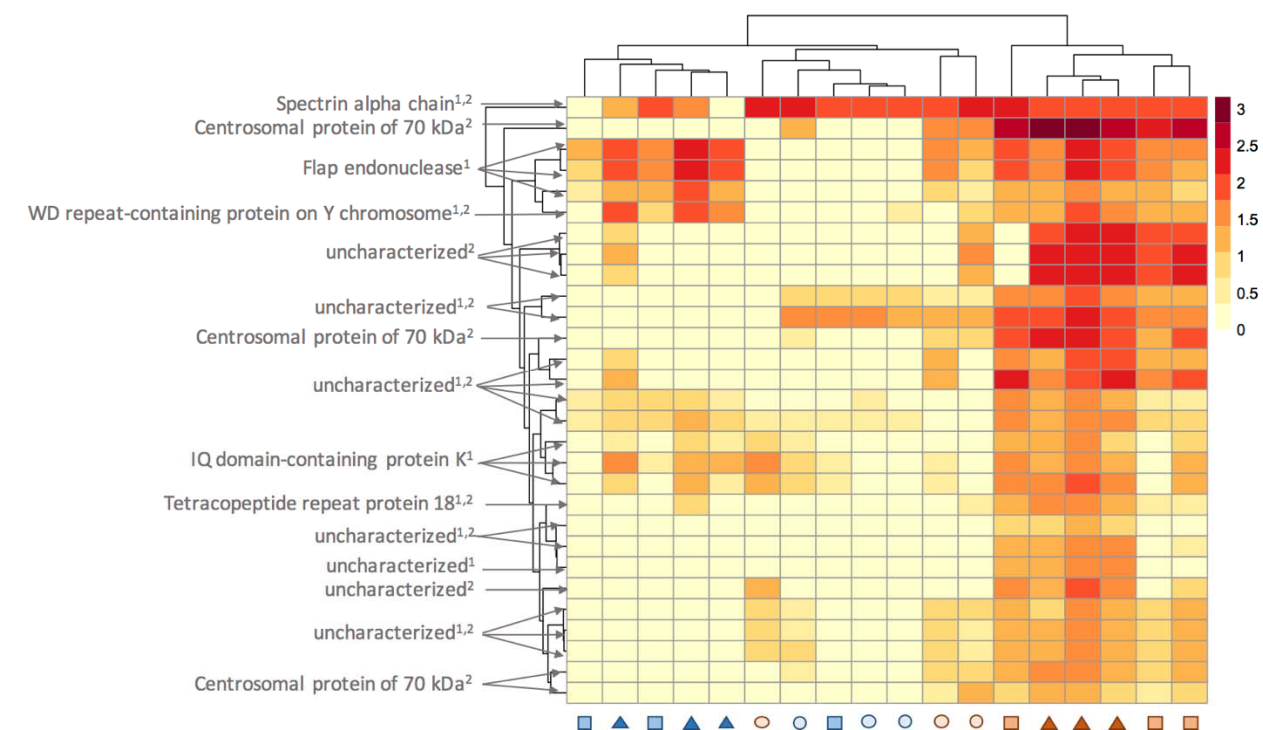

Figure 5. Heatmap of log-normalized peptide transition intensities for 29 significant transitions (based on NMDS analysis) across all samples (early-stage/circles, mid-stage/squares, and late-stage/triangles males/orange and females/blue) gonad. Each row (peptide transition) is labeled by its corresponding protein annotation in gray. Superscripts indicate for which NMDS axis a transition is significant.

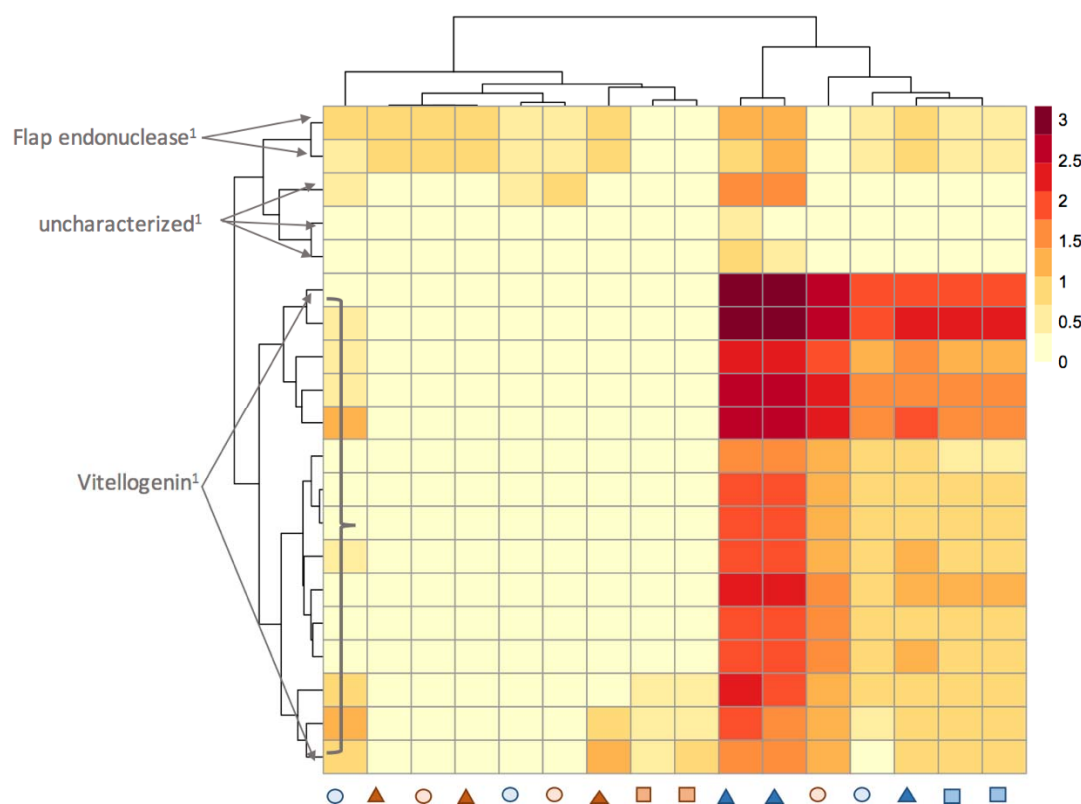

Figure 6. Heatmap of log-normalized peptide transition intensities for 20 significant transitions (based on NMDS analysis) across all samples (early-stage/circles, mid-stage/squares, and late-stage/triangles males/orange and females/blue) hemolymph. Each row (peptide transition) is labeled by its corresponding protein annotation in gray. Superscripts indicate for which NMDS axis a transition is significant.

## Discussion

Proteomics has the capacity to uncover physiological processes underlying functional phenotypic change, including the maturation of reproductive tissue. We have characterized the geoduck clam gonad proteome throughout reproductive maturation for both males and females. Our data dependent analysis (DDA) approach yielded 3,627 detected proteins across both sexes and three maturation stages. This is a significant escalation in the understanding of proteomic responses in maturation stages of marine mollusks. Based on the DDA data, 27 proteins (with a corresponding 85 peptides) from early- and late-stage male and female clams were chosen for selected reaction monitoring (SRM). Peptide transitions were detected from the selected peptides as candidates for biomarker development in gonad (n=212) and in hemolymph (n=171).

## DDA

There are clear proteomic profile differences in the geoduck gonad by both sex and maturation stage and these differences reveal the biochemical pathways underlying tissue specialization. More proteins were differentially abundant between early and late stages of reproductive maturity, compared to early and mid-stages, for both males and females, reflecting that, as maturation progresses, gonad tissue becomes more specialized, expressing a more diverse array of regulatory and structural proteins. Gonad goes from undifferentiated connective tissue to specialized structures that regulate gametogenesis and release of gametes. These phenotypic changes required for reproductive maturity are evident with histology<sup>13</sup> and are realized via changes at the protein level. For example, the zona pellucida (ZP) containing protein (cds.comp134923\_c0\_seq3|m.23445) and vitellogenin (cds.comp144315\_c0\_seq1|m.50928) were more abundant in the female gonad as geoduck matured. The zona pellucida surrounds



vertebrate oocytes and its invertebrate homolog is the vitelline envelope; the vitelline envelope is likely the origin of the zona pellucida (ZP) containing protein and the site of sperm-oocyte recognition and binding. Vitellogenin is an egg yolk protein precursor that is closely linked to gametogenesis in bivalves. Increasing levels of vitellogenin are correlated with advancement in reproductive maturation in oysters<sup>32,33,34</sup>, clams<sup>35</sup>, and mussels<sup>36</sup>.

In females, enrichment analysis of unique proteins and all detected proteins revealed that the early-stage gonad proteome was enriched in proteins involved in protein phosphorylation and proteins associated with carbohydrate metabolism were predominant during the mid-stage. Increase in protein phosphorylation likely represents the activation of translated proteins required to effect gonad structural and functional changes. The enrichment of carbohydrate metabolism in mid-stage females reflects the increased mobilization of carbohydrates to support the energy-intensive process of gonad maturation. Previous biochemical work has highlighted the importance of glycogen metabolism during bivalve reproductive maturation<sup>37,9</sup> and carbohydrate metabolism during vertebrate oocyte maturation<sup>38,39</sup>, however, a more complex overview of gonad carbohydrate metabolism is revealed in the proteomic data. The proteins contributing to the enrichment of carbohydrate metabolism processes in mid-stage females are involved in glycan metabolism (2 enzymes), glycolysis (3 enzymes), gluconeogenesis (2 enzymes), and the pentose phosphate pathway (2 enzymes). These enzymes were detected in the geoduck gonad, but were not differentially abundant. Carbohydrate metabolism is important in invertebrate oocytes up through fertilization, when there is a rapid upregulation of glycolysis.<sup>40</sup>

The late-stage female gonad proteome was enriched in proteins associated with cell adhesion and DNA replication. Cell adhesion is an essential biological process in maturing oocytes in vertebrates.<sup>41,42</sup> The strong cell adhesion signal in late-stage females was driven in

large part by the many cadherin and protocadherin proteins detected in a single female. However, seven protocadherins were detected at significantly higher abundance in more than a single late-stage female - compared to early- and mid-stages. Further, laminin, talin, and vinculin were less abundant in late-stage females compared to other females. Evidence for the importance of DNA replication was more consistent. Proteins with homology to DNA helicase, DNA ligase, proliferating cell nuclear antigen, and ribonucleoside-diphosphate reductase were all more abundant in late-stage compared to early- or mid-stage females. This surge in DNA replication-associated proteins is likely a reflection of an increase of meiosis and mitosis.

Enriched processes in late-stage male geoduck gonad proteome reflect an increase in cell replication during the last steps of sperm formation. Several proteins implicated in mitosis and meiosis were detected at significantly increased abundance in late-stage males compared to early- and mid-stage: centrosomal proteins, dynein, intraflagellar transport protein, kinesin, and alpha and beta tubulin. All of these proteins are instrumental in the cell division and replication and their importance at this maturation stage suggests the presence of rapidly dividing cells. In mussels off the Atlantic coast of Spain, meiotic division begins approximately four months before the onset of spawning, while mitosis reconstructs the gonad during and after spawning.<sup>43</sup> These pieces of proteomic evidence point towards increased cellular energy metabolism and cell division during the development of mature, motile sperm.

Even with a highly specific protein identification database, the DDA method excludes many important, relatively low abundance proteins from analysis.<sup>44</sup> The ten most abundant proteins (as measured by total spectral count) for each sex-maturation stage accounted for 14-26% of the total spectral counts across all proteins for a given sex-stage. Many of these proteins are “housekeeping” proteins, such as actin and myosin, and their dominance in the peptide

mixture was likely masking many informative, low abundance peptides. Similarly, in zebrafish, highly abundant vitellogenin (also highly abundant in the mid- and late-stage females in this study) made it difficult to detect lower abundance proteins using DDA.<sup>45</sup>

# *SRM*

Selected reaction monitoring allows for the detection and absolute quantification of only the most informative proteins' peptides to address a specific hypothesis. We leveraged the DDA dataset to create informative SRM assays of geoduck sex and maturation stage in both gonad and hemolymph. In the gonad tissue, we measured 212 peptide transitions that could differentiate males and females as well as early and late maturation stages. Our assay is based on proteins that are involved in calcium ion binding, phosphorylation, meiosis, DNA replication and repair, and membrane structure. Additionally, seven of these informative proteins were unannotated. These unknown proteins may represent taxon-specific reproductive proteins and warrant further characterization. Reproductive proteins are some of the fastest-evolving, resulting in many species-specific proteins.<sup>46</sup>

A subset of the peptide transitions (n=29) from these proteins were deemed highly informative based on our analysis in gonad samples and would be good candidates for a more streamlined SRM assay. These transitions correspond to six annotated proteins and five unannotated proteins. The annotated proteins are implicated in cytoskeleton structure (spectrin alpha chain), DNA replication and repair (centrosomal protein of 70 kDa, flap endonuclease), and proteins that were identified by motifs and thus yield little functional information (WD repeat-containing protein on Y chromosome, IQ domain containing protein K, and tetrcopeptide repeat protein 18). The 29 transitions were almost uniformly at higher abundance in males than

females, which is likely because we included more proteins derived from the late-stage male proteome in our assay since these yielded transitions with higher MS-based ion intensities.

The peptide-based assay developed from the evidence found in the gonad tissue was applied to circulating hemolymph. We were able to collect data on 171 peptide transitions that were derived from gonad tissue but detectable in the hemolymph, including all the transitions that were added specifically to the hemolymph assay. Peptide transitions from 16 proteins were reliably detected in both gonad and hemolymph, however, only two proteins had transitions that were highly informative in both tissues: flap endonuclease and an uncharacterized protein. The inclusion of vitellogenin in our assay confirmed its presence in geoduck hemolymph during later stages of reproductive maturity in females. Vitellogenin is an informative proteomic biomarker for oyster and sea turtle female reproductive stage.<sup>34,47</sup> In the oyster study, vitellogenin fragments were among the most abundant proteins detected and were particularly accumulated at greater abundances in oocytes associated with low production of larvae.<sup>34</sup> In this case, it was hypothesized that greater accumulation of vitellogenin fragments in the poor versus high quality oyster oocytes was indicative of the enzymatic breakdown of the protein during oocyte ageing.<sup>34</sup>

The full suite of peptide transitions was not detected in hemolymph, likely due to physiological differences between the tissues in which the assay was designed (gonad) and applied (hemolymph). Biomarkers of tissue-specific changes can be difficult to detect in circulating fluid since hemolymph is not the primary site of physiological change. Proteins and their peptide fragments can yield physiologically relevant assays, even for organ-specific changes<sup>48</sup>, but may not be detectable due to different fragmentation patterns or delay in abundance changes between the site of physiological change and the hemolymph or blood. In geoduck hemolymph, 81 transitions were detected in the gonad but not in the hemolymph, but

131 transitions were detected in both tissues. Flap endonuclease and an uncharacterized protein, detected in both tissues, were informative for late-stage female identification in the hemolymph assay with flap endonuclease also an informative biomarker in gonad (Figures 5 & 6). The hemolymph results emphasize both the flexibility of a peptide-based SRM assay as well its limitations when designed for measurement of physiological change in a specific organ or tissue.

Through characterization of the geoduck gonad proteome and development of targeted peptide-based assays for reproductive maturity, we not only exponentially increased genomic resources available for this species, but we also provide an effective approach for non-lethal detection of sex and maturation stage in this species. The gonad peptide transitions could be optimized to a set of 29 transitions that would accurately predict a) geoduck sex and b) reproductive maturation status. In the hemolymph, 20 peptide transitions can accurately differentiate late-stage female geoduck from others. Together these molecular tools can directly address the geoduck production problem of asynchronous spawning due to different maturation stages and unknown sexes.

## Acknowledgements

This work was supported and funded by a grant from the University of Washington Royalty Research Fund (to SR), a Training Grant from the National Institutes of Health (to ETS) (T32 HG00035), and the University of Washington's Proteomics Resource (UWPR95794). We would like to thank Jimmy Eng and Priska von Haller for their help in data acquisition and analysis; Sonia Ting, Jarrett Egertson, Lindsay Pino, Yuval Boss, and Nick Shulman for assistance with data analysis; and the Genome Sciences Information and Technology group for

their technical support. ETS and BLN would like to thank IJE and TAN for their ongoing inspiration.

**Supporting Information.** The following files are available free of charge via the internet [goo.gl/uoi9H1](http://goo.gl/uoi9H1)

**S1-Pgenerosa-gonad-protein-v3.fasta** Deduced protein sequences derived from gonad transcriptome sequencing

**S2-comet.params** Parameter file used in Comet searches for the DDA data

**S3-technical-reps.pdf** NMDS of the whole proteomic profiles (DDA data) for the three biological replicates and corresponding three technical replicates for each sex and maturation stage. Blue points represent female proteomes and orange represent male. Shapes and shade (light to dark) represent the different stages: circles for early-stage, squares for mid-stage, and triangles for late-stage

**S4-technical-reps-box-plots.pdf** Box plot of the coefficients of variation for protein spectral counts from DDA data A) across technical replicates for each geoduck biological replicate and B) across biological replicates for each sex-maturation stage. CVs were calculated in R using the raster package. X-axis labels correspond to the geoduck sex and maturation stage, indicated by e.g. “EF3” represents early-stage female sample 3. The boxes represent the upper and lower quartiles of the data distribution; horizontal black line represents median value; “whiskers” extend to the greatest and least values, excluding outliers; open circles represent outliers (more or less than 3/2 times the upper or lower quartiles)

**S5-NMDS-SRM-tech-reps.pdf** NMDS of gonad SRM data for the 3 biological replicates and corresponding three technical replicates for each sex and maturation stage. Blue points represent female proteomes and orange represent male. Shapes and shade (light to dark) represent the different stages: circles for early-stage, squares for mid-stage, and triangles for late-stage

**S6-spc-nsaf-prot-names.txt** All identified proteins from the DDA experiment with Uniprot annotations (e-value cut-off of 1E-10), total spectral counts for each technical replicate, calculated normalized spectral abundance factor (NSAF) for combined technical replicates, and indication of significantly differentially abundant proteins by pairwise comparison. Columns containing spectral count data have headers “SpC” followed by the biological replicate number, sex, maturation stage, and technical replicate (for example, “SpC 3FE” is technical replicate 1 from early-stage female 3). Notation for NSAF is similar to SpC. The 9 columns in the sheet have headers such as “EFvLF” (comparison between early- and late-stage females) have asterisks in the cells that correspond to proteins that were differentially abundant according to QSpec for each given comparison. The last two columns (“NMDS Gonad” and “NMDS Hemolymph”) have asterisks in cells that correspond to the proteins with peptide transitions that contribute significantly to the SRM NMDS plot distributions

**S7-DAGs.pdf** Enrichment plots for early- and mid-maturation stage geoduck (EM, EF, MM, MF). Processes colored in blue were enriched from the set of all proteins detected in the given sex-stage, while red processes are from the protein set that was uniquely detected in a sex-stage. Darker colors represent higher significance of enrichment

**S8-GOterms-table.csv** GO biological processes enriched in proteins that were differentially abundant between stages within a sex (e.g. early- vs. mid-stage female) or between sexes within

a stage (e.g LF vs. LM). Only the most specific GO terms in the GO hierarchy are listed. No terms are listed when a comparison was not made.

**S9-SRM-data.xlsx** Raw Skyline output (in the tab “Skyline output) and peak intensities normalized by QC peptide abundance (“Normalized Intensities”) for the gonad and hemolymph SRM data.

**S10-SRM-cv-boxplots.pdf** Integrated peak area coefficient of variation values across all gonad peptide transitions (n=212) and hemolymph peptide transitions (n=171) A) across technical replicates for each geoduck biological replicate in gonad tissue, B) across biological replicates for each sex-maturation stage in gonad tissue, C) across technical replicates for each geoduck biological replicate in hemolymph, and D) across biological replicates for each sex-maturation stage in hemolymph. CVs were calculated in R using the raster package. X-axis labels correspond to the geoduck sex and maturation stage, indicated by e.g. “EF3” represents early-stage female sample 3. The boxes represent the upper and lower quartiles of the data distribution; horizontal black line represents median value; “whiskers” extend to the greatest and least values, excluding outliers; open circles represent outliers (more or less than 3/2 times the upper or lower quartiles)

## References

- (1) Newell, R. I. Ecosystem influences of natural and cultivated populations of suspension-feeding bivalve mollusks: A review. *J. Shellfish Res.* **2004**, 23 (1), 51–62.
- (2) Hoffmann, A.; Bradbury, A.; Goodwin, C. L. Modeling geoduck, *Panopea abrupta* (Conrad, 1849) population dynamics. I. Growth. *J. Shellfish Res.* **2000**, 19 (1), 57–62.



- (3) Northern Economics, I. *The Economic Impact of Shellfish Aquaculture in Washington, Oregon and California. Prepared for Pacific Shellfish Institute*; 2013.
- (4) Scott, A. P. Do mollusks use vertebrate sex steroids as reproductive hormones? II. Critical review of the evidence that steroids have biological effects. *Steroids* **2013**, 78 (2), 268–281.
- (5) Fernandes, D.; Denise, F.; Barbara, L.; Cinta, P. Biosynthesis and metabolism of steroids in molluscs. *J. Steroid Biochem. Mol. Biol.* **2011**, 127 (3-5), 189–195.
- (6) Palacios, E.; Racotta, I. S.; Arjona, O.; Marty, Y.; Le Coz, J. R.; Moal, J.; Samain, J. F. Lipid composition of the pacific lion-paw scallop, *Nodipecten subnodosus*, in relation to gametogenesis. *Aquaculture* **2007**, 266 (1-4), 266–273.
- (7) Anantharaman, S.; Craft, J. A. Annual variation in the levels of transcripts of sex-specific genes in the mantle of the common mussel, *Mytilus edulis*. *PLoS One* **2012**, 7 (11), e50861.
- (8) Ciocan, C. M.; Cubero-Leon, E.; Minier, C.; Rotchell, J. M. Identification of reproduction-specific genes associated with maturation and estrogen exposure in a marine bivalve *Mytilus edulis*. *PLoS One* **2011**, 6 (7), e22326.
- (9) Li, Q.; Qi, L.; Makoto, O.; Katsuyoshi, M. Seasonal biochemical variations in Pacific oyster gonadal tissue during sexual maturation. *Fish. Sci.* **2000**, 66 (3), 502–508.
- (10) Dheilly, N. M.; Lelong, C.; Huvet, A.; Kellner, K.; Dubos, M.-P.; Riviere, G.; Boudry, P.; Favrel, P. Gametogenesis in the Pacific oyster *Crassostrea gigas*: a microarrays-based analysis identifies sex and stage specific genes. *PLoS One* **2012**, 7 (5), e36353.
- (11) Arcos, F. G.; Ibarra, A. M.; del Carmen Rodríguez-Jaramillo, M.; García-Latorre, E. A.; Celia, V.-B. Quantification of vitellin/vitellogenin-like proteins in the oyster *Crassostrea corteziensis* (Hertlein 1951) as a tool to predict the degree of gonad maturity. *Aquac. Res.* **2009**, 40 (6), 644–655.

- (12) Li, Y.; Siddiqui, G.; Wikfors, G. H. Non-lethal determination of sex and reproductive condition of Eastern oysters *Crassostrea virginica* Gmelin using protein profiles of hemolymph by Proteinchip® and SELDI-TOF-MS technology. *Aquaculture* **2010**, 309 (1–4), 258–264.
- (13) Crandall, G.; Roberts, S. Reproductive Maturation in Geoduck clams (*Panopea generosa*) [https://figshare.com/articles/Reproductive\\_Maturation\\_in\\_Geoduck\\_clams\\_Panopea\\_generosa\\_/3205975/1](https://figshare.com/articles/Reproductive_Maturation_in_Geoduck_clams_Panopea_generosa_/3205975/1). DOI: <https://dx.doi.org/10.6084/m9.figshare.3205975.v1>
- (14) Timmins-Schiffman, E.; Nunn, B. L.; Goodlett, D. R.; Roberts, S. B. Shotgun proteomics as a viable approach for biological discovery in the Pacific oyster. *Conserv Physiol* **2013**, 1 (1), cot009.
- (15) Grabherr, M. G.; Haas, B. J.; Yassour, M.; Levin, J. Z.; Thompson, D. A.; Amit, I.; Adiconis, X.; Fan, L.; Raychowdhury, R.; Zeng, Q.; et al. *Full-length transcriptome assembly from RNA-seq data without a reference genome*; 2011.
- (16) Pedrioli, P. G. A. Trans-Proteomic Pipeline: A Pipeline for Proteomic Analysis. In *Methods in Molecular Biology*; 2009; pp 213–238.
- (17) Deutsch, E. W.; Mendoza, L.; Shteynberg, D.; Slagel, J.; Sun, Z.; Moritz, R. L. Trans-Proteomic Pipeline, a standardized data processing pipeline for large-scale reproducible proteomics informatics. *Proteomics Clin. Appl.* **2015**, 9 (7-8), 745–754.
- (18) Oksanen, J.; Guillaume Blanchet, F.; Friendly, M.; Kindt, R.; Legendre, P.; McGlinn, D.; Minchin, P. R.; O’Hara, R. B.; Simpson, G. L.; Solymos, P.; et al. *vegan: Community Ecology Package*; 2016.
- (19) R Core Team. *R: A language and environment for statistical computing*; R Foundation for Statistical Computing, Vienna, Austria, 2015.

- (20) Florens, L.; Carozza, M. J.; Swanson, S. K.; Fournier, M.; Coleman, M. K.; Workman, J. L.; Washburn, M. P. Analyzing chromatin remodeling complexes using shotgun proteomics and normalized spectral abundance factors. *Methods* **2006**, *40* (4), 303–311.
- (21) Choi, H.; Fermin, D.; Nesvizhskii, A. I. Significance analysis of spectral count data in label-free shotgun proteomics. *Mol. Cell. Proteomics* **2008**, *7* (12), 2373–2385.
- (22) Oliveros, J. C. *Venny. An interactive tool for comparing lists with Venn's diagrams*; 2007-2015.
- (23) MacLean, B.; Tomazela, D. M.; Shulman, N.; Chambers, M.; Finney, G. L.; Frewen, B.; Kern, R.; Tabb, D. L.; Liebler, D. C.; MacCoss, M. J. Skyline: an open source document editor for creating and analyzing targeted proteomics experiments. *Bioinformatics* **2010**, *26* (7), 966–968.
- (24) Panchaud, A.; Scherl, A.; Shaffer, S. A.; von Haller, P. D.; Kulasekara, H. D.; Miller, S. I.; Goodlett, D. R. Precursor acquisition independent from ion count: how to dive deeper into the proteomics ocean. *Anal. Chem.* **2009**, *81* (15), 6481–6488.
- (25) Chambers, M. C.; Maclean, B.; Burke, R.; Amodei, D.; Ruderman, D. L.; Neumann, S.; Gatto, L.; Fischer, B.; Pratt, B.; Egertson, J.; et al. A cross-platform toolkit for mass spectrometry and proteomics. *Nat. Biotechnol.* **2012**, *30* (10), 918–920.
- (26) Ting, Y. S.; Egertson, J. D.; Payne, S. H.; Kim, S.; MacLean, B.; Käll, L.; Aebersold, R.; Smith, R. D.; Noble, W. S.; MacCoss, M. J. Peptide-Centric Proteome Analysis: An Alternative Strategy for the Analysis of Tandem Mass Spectrometry Data. *Mol. Cell. Proteomics* **2015**, *14* (9), 2301–2307.

- (27) Wolf-Yadlin, A.; Hautaniemi, S.; Lauffenburger, D. A.; White, F. M. Multiple reaction monitoring for robust quantitative proteomic analysis of cellular signaling networks. *Proc. Natl. Acad. Sci. U. S. A.* **2007**, *104* (14), 5860–5865.
- (28) Picotti, P.; Aebersold, R. Selected reaction monitoring-based proteomics: workflows, potential, pitfalls and future directions. *Nat. Methods* **2012**, *9* (6), 555–566.
- (29) Moreira, R.; Pereiro, P.; Canchaya, C.; Posada, D.; Figueras, A.; Novoa, B. RNA-Seq in *Mytilus galloprovincialis*: comparative transcriptomics and expression profiles among different tissues. *BMC Genomics* **2015**, *16* (1), 728.
- (30) Hijmans, R. J. Geographic Data Analysis and Modeling [R package raster version 2.5-8].
- (31) Kolde, R. *pheatmap: Pretty Heatmaps*; 2015.
- (32) Matsumoto, T.; Nakamura, A. M.; Mori, K.; Kayano, T. Molecular characterization of a cDNA encoding putative vitellogenin from the Pacific oyster *Crassostrea gigas*. *Zoolog. Sci.* **2003**, *20* (1), 37–42.
- (33) Arcos, F. G.; Ibarra, A. M.; Rodríguez-Jaramillo, M. del C.; García-Latorre, E. A.; Vazquez-Boucard, C. Quantification of vitellin/vitellogenin-like proteins in the oyster *Crassostrea corteziensis* (Hertlein 1951) as a tool to predict the degree of gonad maturity. *Aquac. Res.* **2009**, *40* (6), 644–655.
- (34) Corporeau, C.; Vanderplancke, G.; Boulais, M.; Suquet, M.; Quéré, C.; Boudry, P.; Huvet, A.; Madec, S. Proteomic identification of quality factors for oocytes in the Pacific oyster *Crassostrea gigas*. *J. Proteomics* **2012**, *75* (18), 5554–5563.
- (35) Blaise, C.; Gagné, F.; Pellerin, J.; Hansen, P. D. Determination of vitellogenin-like properties in *Mya arenaria* hemolymph (Saguenay Fjord, Canada): A potential biomarker for endocrine disruption. *Environ. Toxicol.* **1999**, *14* (5), 455–465.

- (36) Won, S.-J.; Novillo, A.; Custodia, N.; Rie, M. T.; Fitzgerald, K.; Osada, M.; Callard, I. P. The Freshwater Mussel (*Elliptio complanata*) as a Sentinel Species: Vitellogenin and Steroid Receptors. *Integr. Comp. Biol.* **2005**, *45* (1), 72–80.
- (37) Beukema, J. J.; De Bruin, W. Seasonal changes in dry weight and chemical composition of the soft parts of the tellinid bivalve *Macoma balthica* in the Dutch Wadden Sea. *Neth. J. Sea Res.* **1977**, *11* (1), 42–55.
- (38) Dworkin, M. B.; Dworkin-Rastl, E. Metabolic regulation during early frog development: glycogenic flux in *Xenopus* oocytes, eggs, and embryos. *Dev. Biol.* **1989**, *132* (2), 512–523.
- (39) Harris, S. E.; Adriaens, I.; Leese, H. J.; Gosden, R. G.; Picton, H. M. Carbohydrate metabolism by murine ovarian follicles and oocytes grown in vitro. *Reproduction* **2007**, *134* (3), 415–424.
- (40) Yasumasu, I.; Tazawa, E.; Fujiwara, A. Glycolysis in the eggs of the echiuroid, *Urechis unicinctus* and the oyster, *Crassostrea gigas*. *Exp. Cell Res.* **1975**, *93* (1), 166–174.
- (41) Fusi, F. M.; Vignali, M.; Busacca, M.; Bronson, R. A. Evidence for the presence of an integrin cell adhesion receptor on the oolemma of unfertilized human oocytes. *Mol. Reprod. Dev.* **1992**, *31* (3), 215–222.
- (42) Campbell, S.; Swann, H. R.; Seif, M. W.; Kimber, S. J.; Aplin, J. D. Integrins and adhesion molecules: Cell adhesion molecules on the oocyte and preimplantation human embryo. *Hum. Reprod.* **1995**, *10* (6), 1571–1578.
- (43) Suárez, M. P.; Alvarez, C.; Molist, P.; Juan, F. S. PARTICULAR ASPECTS OF GONADAL CYCLE AND SEASONAL DISTRIBUTION OF GAMETOGENIC STAGES OF *MYTILUS GALLOPROVINCIALIS* CULTURED IN THE ESTUARY OF VIGO. *J. Shellfish Res.* **2005**, *24* (2), 531–540.

- (44) Pedersen, S. K.; Harry, J. L.; Sebastian, L.; Baker, J.; Traini, M. D.; McCarthy, J. T.; Manoharan, A.; Wilkins, M. R.; Gooley, A. A.; Righetti, P. G.; et al. Unseen proteome: mining below the tip of the iceberg to find low abundance and membrane proteins. *J. Proteome Res.* **2003**, 2 (3), 303–311.
- (45) Groh, K. J.; Nesatyy, V. J.; Segner, H.; Eggen, R. I. L.; Suter, M. J.-F. Global proteomics analysis of testis and ovary in adult zebrafish (*Danio rerio*). *Fish Physiol. Biochem.* **2011**, 37 (3), 619–647.
- (46) Swanson, W. J.; Vacquier, V. D. The rapid evolution of reproductive proteins. *Nat. Rev. Genet.* **2002**, 3 (2), 137–144.
- (47) Plumel, M. I.; Wasselin, T.; Plot, V.; Strub, J.-M.; Van Dorselaer, A.; Carapito, C.; Georges, J.-Y.; Bertile, F. Mass spectrometry-based sequencing and SRM-based quantitation of two novel vitellogenin isoforms in the leatherback sea turtle (*Dermochelys coriacea*). *J. Proteome Res.* **2013**, 12 (9), 4122–4135.
- (48) Klee, E. W.; Bondar, O. P.; Goodmanson, M. K.; Dyer, R. B.; Erdogan, S.; Bergstralh, E. J.; Bergen, H. R., 3rd; Sebo, T. J.; Klee, G. G. Candidate serum biomarkers for prostate adenocarcinoma identified by mRNA differences in prostate tissue and verified with protein measurements in tissue and blood. *Clin. Chem.* **2012**, 58 (3), 599–609.
